# Supplementary material for: Carboxylative cyclization of propargylamines with supercritical carbon dioxide
Source: Royal Society of Chemistry journal article supplement (doi:10.1039/b603700c), 2006-01-01
Supplement: b603700c.pdf [file b603700c.pdf]

## Supporting Information

### Carboxylative cyclization of propargylamines with supercritical carbon dioxide

Yoshihito Kayaki, Masafumi Yamamoto, Tomoyuki Suzuki and Takao Ikariya\*

PRESTO, Japan Science and Technology Agency and Graduate School of Science and Engineering, Tokyo Institute of Technology, O-okayama, Meguro-ku, Tokyo 152-8552, Japan.

E-mail: tikariya@apc.titech.ac.jp

Tel: +81-3-5734-2636; Fax: +81-3-5734-2637

**General Information.**  $^1\text{H}$ ,  $^{13}\text{C}$  and  $^{19}\text{F}$  NMR spectra were recorded on a JEOL Lambda 300 spectrometer; chemical shifts were referenced to residual protio impurities in the deuterated solvent ( $^1\text{H}$ ), to the deuterated solvent ( $^{13}\text{C}$ ) or to external  $\text{CF}_3\text{COOH}$  ( $^{19}\text{F}$ ). All spectra were obtained at ambient probe temperature unless stated otherwise. Abbreviations for NMR data are as follows: s = singlet, d = doublet, t = triplet, q = quartet, sept = septet, or m = multiplet. HRMS-ESI was performed on a JEOL AccuTOF CS spectrometer.

Liquefied carbon dioxide (99.999%) was purchased from Showa Tansan. *N*-methylpropargylamine (**1a**) and propargylamine (**1i**) were purchased from Aldrich Chemicals and were used after purification by distillation. Other terminal propargylamines (**1b-1h**) and *N*-methylbut-2-ylamine (**3a**) were prepared by propargylation of primary amines by treatment of the corresponding propargyl chlorides

and a base. Internal propargylamines (**3b-3f**) were prepared by Sonogashira reactions<sup>1</sup> of *N*-methyl-*N*-*tert*-butoxycarbonylpropargylamine<sup>2</sup> with aryl halides. The following deprotection of the *tert*-butoxycarbonyl (Boc) moiety on the amino group was performed by treatment with ethereal HCl or trimethylsilyl iodide.

#### Analytical data for new compounds.

##### ***3-Methyl-5-methyleneoxazolidin-2-one (2a)***

<sup>1</sup>H NMR (300.5 MHz, CDCl<sub>3</sub>, rt): δ 2.83 (s, 3H, NCH<sub>3</sub>), 4.10 (s, 2H, CH<sub>2</sub>), 4.21 (d, <sup>4</sup>J(H-H) = 2.0 Hz, 1H, C=CH), 4.63 (d, <sup>4</sup>J(H-H) = 2.0 Hz, 1H, C=CH); <sup>13</sup>C NMR (75.5 MHz, CDCl<sub>3</sub>, rt): δ 30.2, 49.7, 86.2, 148.7, 155.6.

##### ***3-Ethyl-5-methyleneoxazolidin-2-one (2b)***

<sup>1</sup>H NMR (300.5 MHz, CDCl<sub>3</sub>, rt): δ 1.13 (t, <sup>3</sup>J(H-H) = 7.3 Hz, 3H, NCH<sub>2</sub>CH<sub>3</sub>), 3.31 (q, <sup>3</sup>J(H-H) = 7.3 Hz, 2H, NCH<sub>2</sub>CH<sub>3</sub>), 4.12 (ABX pattern, 2H, CH<sub>2</sub>), 4.24 (ABX pattern, 1H, C=CH), 4.68 (ABX pattern, 1H, C=CH); <sup>13</sup>C NMR (75.5 MHz, CDCl<sub>3</sub>, rt): δ 12.5, 19.5, 36.2, 53.4, 85.4, 154.5, 155.7.

##### ***3-Propyl-5-methyleneoxazolidin-2-one (2c)***

<sup>1</sup>H NMR (300.5 MHz, CDCl<sub>3</sub>, rt): δ 0.87 (t, <sup>3</sup>J(H-H) = 7.3 Hz, 3H, NCH<sub>2</sub>CH<sub>2</sub>CH<sub>3</sub>), 1.52 (m, 2H, NCH<sub>2</sub>CH<sub>2</sub>CH<sub>3</sub>), 3.20 (t, <sup>3</sup>J(H-H) = 7.3 Hz, 2H, NCH<sub>2</sub>CH<sub>2</sub>CH<sub>3</sub>), 4.10 (ABX pattern, 2H, CH<sub>2</sub>), 4.22 (ABX pattern, 1H, C=CH), 4.67 (ABX pattern, 1H, C=CH).

##### ***3-(2'-Propyl)-5-methyleneoxazolidin-2-one (2d)***

<sup>1</sup>H NMR (300.5 MHz, CDCl<sub>3</sub>, rt): δ 1.19 (d, <sup>3</sup>J(H-H) = 6.8 Hz, 6H, NCH(CH<sub>3</sub>)<sub>2</sub>), 4.04 (sept, <sup>3</sup>J(H-H) = 6.8 Hz, 1H, NCH(CH<sub>3</sub>)<sub>2</sub>), 4.21 (s, 2H, CH<sub>2</sub>), 4.35 (s, 1H, C=CH), 4.67 (s, 1H, C=CH).

***3,4-Dimethyl-5-methyleneoxazolidin-2-one (2e)***

<sup>1</sup>H NMR (300.5 MHz, CDCl<sub>3</sub>, rt): δ 1.38 (d, <sup>3</sup>J(H-H) = 6.3 Hz, 3H, CHCH<sub>3</sub>), 2.81 (s, 3H, NCH<sub>3</sub>), 4.31 (m, 1H, C=CH), 4.38 (m, 1H, CHCH<sub>3</sub>), 4.57 (m, 1H, C=CH).

***3-Ethyl-4-methyl-5-methyleneoxazolidin-2-one (2f)***

<sup>1</sup>H NMR (300.5 MHz, CDCl<sub>3</sub>, rt): δ 1.12 (t, <sup>3</sup>J(H-H) = 7.2 Hz, 3H, NCH<sub>2</sub>CH<sub>3</sub>), 1.37 (d, <sup>3</sup>J(H-H) = 6.8 Hz, 3H, CHCH<sub>3</sub>), 3.14 (m, 1H, NCH<sub>2</sub>CH<sub>3</sub>), 3.53 (m, 1H, NCH<sub>2</sub>CH<sub>3</sub>), 4.25 (m, 1H, C=CH), 4.42 (m, 1H, CHCH<sub>3</sub>), 4.71 (m, 1H, C=CH).

***3-Benzyl-4-methyl-5-methyleneoxazolidin-2-one (2g)***

<sup>1</sup>H NMR (300.5 MHz, CDCl<sub>3</sub>, rt): δ 1.22 (d, <sup>3</sup>J(H-H) = 6.3 Hz, 3H, CHCH<sub>3</sub>), 4.0–4.1 (m, 3H, C=CH, CH<sub>2</sub>C<sub>6</sub>H<sub>5</sub>), 4.6–4.7 (m, 2H, C=CH, CHCH<sub>3</sub>, CH<sub>2</sub>C<sub>6</sub>H<sub>5</sub>), 7.1–7.3 (m, 5H, NCH<sub>2</sub>C<sub>6</sub>H<sub>5</sub>).

***3,4,4-Trimethyl-5-methyleneoxazolidin-2-one (2h)***

<sup>1</sup>H NMR (300.5 MHz, CDCl<sub>3</sub>, rt): δ 1.34 (s, 6H, C(CH<sub>3</sub>)<sub>2</sub>), 2.76 (s, 3H, NCH<sub>3</sub>), 4.19 (d, <sup>4</sup>J(H-H) = 3.4 Hz, 1H, C=CH), 4.59 (d, <sup>4</sup>J(H-H) = 3.4 Hz, 1H, C=CH).

***(Z)-5-Benzylidene-3-methyloxazolidin-2-one (4b)***

<sup>1</sup>H NMR (300.5 MHz, CDCl<sub>3</sub>): δ 2.91 (s, 3H, NCH<sub>3</sub>), 4.22 (s, 2H, CH<sub>2</sub>), 5.46 (s, 1H, CCH), 7.20 (t, <sup>3</sup>J(H-H) = 7.3 Hz, 1H, *p*-C<sub>6</sub>H<sub>5</sub>), 7.30 (dd, 2H, <sup>3</sup>J(H-H) = 7.3, 7.6 Hz, *m*-C<sub>6</sub>H<sub>5</sub>), 7.53 (d, <sup>3</sup>J(H-H) = 7.6 Hz, 2H, *o*-C<sub>6</sub>H<sub>5</sub>); <sup>13</sup>C NMR (75.6 MHz, CDCl<sub>3</sub>): δ 29.9, 50.3, 102.3, 126.2, 127.7, 127.9, 133.0, 141.2, 155.2. Anal. Calcd for C<sub>11</sub>H<sub>11</sub>NO<sub>2</sub>: C 69.83; H 5.86; N 7.40, Found: C 69.59; H 5.78; N 7.27.

***(Z)-3-Methyl-5-(4'-trifluoromethylbenzylidene)oxazolidin-2-one (4c)***

<sup>1</sup>H NMR (300.5 MHz, CDCl<sub>3</sub>): δ 2.86 (s, 3H, NCH<sub>3</sub>), 4.19 (d, <sup>4</sup>J(H-H) = 1.7 Hz, 2H, CH<sub>2</sub>), 5.43 (t, <sup>4</sup>J(H-H) = 2.0 Hz, 1H, CCH), 7.45 (m, 2H, C<sub>6</sub>H<sub>4</sub>), 7.54 (m, 2H, C<sub>6</sub>H<sub>4</sub>); <sup>13</sup>C NMR (75.6 MHz, CDCl<sub>3</sub>): δ 30.1, 50.6, 101.2, 124.0 (q, <sup>1</sup>J<sub>C-F</sub> = 271.6 Hz), 125.0 (q, <sup>2</sup>J<sub>C-F</sub> = 3.8 Hz), 128.0, 137.0, 144.0, 155.0; <sup>19</sup>F NMR (282.7 MHz, CDCl<sub>3</sub>): δ -63.4 (s). HRMS(ESI): *m/z* Calcd for C<sub>12</sub>H<sub>10</sub>F<sub>3</sub>NNaO<sub>2</sub>: 280.0561, Found: 280.0547 [M+Na]<sup>+</sup>.

***(Z)*-5-[3',5'-Bis(trifluoromethyl)benzylidene]-3-methyloxazolidin-2-one (4d)**

<sup>1</sup>H NMR (300.5 MHz, CDCl<sub>3</sub>): δ 3.00 (s, 3H, NCH<sub>3</sub>), 4.35 (d, <sup>4</sup>J(H-H) = 2.2 Hz, 2H, CH<sub>2</sub>), 5.56 (t, <sup>4</sup>J(H-H) = 2.2 Hz, 1H, CCH), 7.67 (s, 1H, C<sub>6</sub>H<sub>4</sub>), 7.94 (s, 2H, C<sub>6</sub>H<sub>4</sub>); <sup>13</sup>C NMR (75.6 MHz, CDCl<sub>3</sub>): δ 30.6, 50.8, 100.2, 120.1, 123.3 (q, <sup>1</sup>J<sub>C-F</sub> = 271.6 Hz), 127.7, 131.7 (q, <sup>2</sup>J<sub>C-F</sub> = 33.6 Hz), 135.5, 145.2, 154.8; <sup>19</sup>F NMR (282.7 MHz, CDCl<sub>3</sub>): δ -63.7 (s). HRMS(ESI): *m/z* Calcd for C<sub>13</sub>H<sub>9</sub>F<sub>6</sub>NNaO<sub>2</sub>: 348.0435, Found: 348.0425 [M+Na]<sup>+</sup>.

***(Z)*-4-(3'-Methyl-2'-oxo-oxazolidin-5'-ylidenemethyl)benzotrile (4e)**

<sup>1</sup>H NMR (300.5 MHz, CDCl<sub>3</sub>): δ 3.16 (s, 3H, NCH<sub>3</sub>), 3.75 (s, 2H, CH<sub>2</sub>), 6.12 (t, <sup>4</sup>J(H-H) = 1.0 Hz, 1H, CCH), 7.33 (m, 2H, C<sub>6</sub>H<sub>4</sub>), 7.60 (m, 2H, C<sub>6</sub>H<sub>4</sub>); <sup>13</sup>C NMR (75.6 MHz, CDCl<sub>3</sub>): δ 30.1, 32.0, 110.5, 112.7, 118.3, 129.2, 132.1, 137.1, 141.1, 155.4. HRMS(ESI): *m/z* Calcd for C<sub>12</sub>H<sub>10</sub>N<sub>2</sub>NaO<sub>2</sub>: 237.0640, Found: 237.0656 [M+Na]<sup>+</sup>.

***(Z)*-5-(4'-Acetylbenzylidene)-3-methyloxazolidin-2-one (4f)**

<sup>1</sup>H NMR (300.5 MHz, CDCl<sub>3</sub>): δ 2.58 (s, 3H, COCH<sub>3</sub>), 3.15 (s, 3H, NCH<sub>3</sub>), 3.75 (s, 2H, CH<sub>2</sub>), 6.06 (t, <sup>4</sup>J(H-H) = 1.2 Hz, 1H, CCH), 7.32 (m, 2H, C<sub>6</sub>H<sub>4</sub>), 7.91 (m, 2H, C<sub>6</sub>H<sub>4</sub>); <sup>13</sup>C NMR (75.6 MHz, CDCl<sub>3</sub>): δ 26.3, 30.1, 32.0, 112.3, 128.4, 128.7, 135.7, 137.9, 141.0, 155.5, 197.4. HRMS(ESI): *m/z* Calcd for C<sub>13</sub>H<sub>13</sub>NNaO<sub>3</sub>: 254.0793, Found: 254.0786 [M+Na]<sup>+</sup>.

## References

1 K. M. Miller, C. Molinaro and T. F. Jamison, *Tetrahedron Asymmetry*, 2003, **14**, 3619-

3625.

2 S. I. Kahn and M. W. Grinstaff, *J. Am. Chem. Soc.*, 1999, **121**, 4704-4705.
